# Supplementary material for: Hybrid SiO2@POSS nanofiller: a promising reinforcing system for rubber nanocomposites
Source: Royal Society of Chemistry journal article supplement (doi:10.1039/c7qm00045f), 2017-01-01
Supplement: c7qm00045f1.pdf [file c7qm00045f1.pdf]

**Supporting Information:**

# Hybrid SiO<sub>2</sub>@POSS nanofiller: a promising reinforcing system for rubber nanocomposites

*Massimiliano D'Arienzo<sup>\*a</sup>, Matteo Redaelli<sup>a</sup>, Emanuela Callone<sup>b</sup>, Lucia Conzatti<sup>c</sup>, Barbara Di Credico<sup>a</sup>, Sandra Dirè<sup>b</sup>, Luca Giannini<sup>d</sup>, Stefano Polizzi<sup>e</sup>, Ilaria Schizzi<sup>d</sup>, Roberto Scotti<sup>a</sup>, Luciano Tadiello<sup>d</sup> and Franca Morazzoni<sup>a</sup>*

<sup>a</sup> Dept. of Materials Science, INSTM, University of Milano-Bicocca, Via R. Cozzi, 55, 20125 Milano, Italy. Fax: +39-02-64485400 Tel: +39-02-64485023 \*E-mail: massimiliano.darienzo1@unimib.it

<sup>b</sup> “K. Müller” Magnetic Resonance Lab., Dept. of Industrial Engineering, University of Trento, Via Sommarive, 9, 38123 Trento, Italy

<sup>c</sup> Istituto per lo Studio delle Macromolecole, ISMAC, CNR, Via De Marini 6, 16149 Genova, Italy

<sup>d</sup> Pirelli Tyre SpA, Viale Sarca, 222, 20126 Milano, Italy

<sup>e</sup> Dipartimento di Scienze Molecolari e Nanosistemi, Università Ca' Foscari Venezia and Centro di Microscopia Elettronica “G. Stevanato” Via Torino 155/b, 30172 Venezia-Mestre (Italy)

**KEYWORDS:** rubber nanocomposites, hybrid materials, POSS, nanofillers

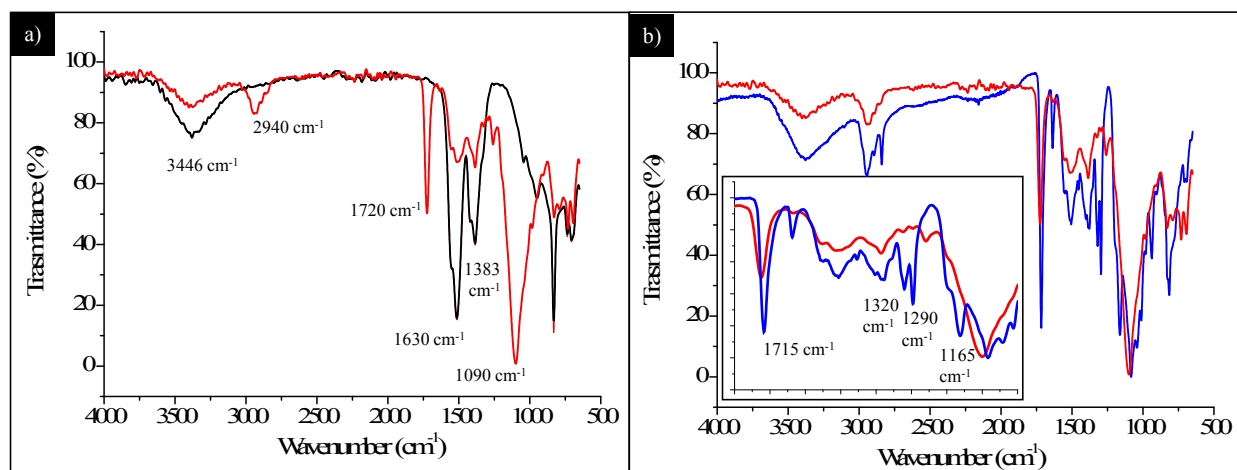

**Figure S1.** FT-IR spectra of: a) pristine ZnO (black line) and ZnO functionalized with TMMS (ZnO-TMMS, red line); b) ZnO-TMMS (red line) and ZnO@POSS-10 (blue line).

Pristine ZnO (Fig. S1a, black line) showed broad absorption bands at  $3380\text{ cm}^{-1}$  and  $1550\text{ cm}^{-1}$  assigned to the stretching and bending vibration modes of water most likely adsorbed by H-bonding to OH groups on the surface of ZnO nanoparticles. The other band at  $1383\text{ cm}^{-1}$  in the ZnO sample was considered an impurity. After reacting ZnO with TMMS, the spectrum (Fig. S1a, red line) revealed the characteristic absorption bands of the silane. In detail, the weak band at  $2940\text{ cm}^{-1}$  was assigned to the stretching of C–H vibration, while those at  $1725$  and at  $1085\text{ cm}^{-1}$  were associated to the vibration of C=O and Si–O–C bonds of TMMS <sup>(i)</sup>.

In Figure S1b the spectra of ZnO-TMMS (red line) and ZnO@POSS-10 (blue line) are compared. ZnO@POSS-10 NPs show the bands at  $2950$  and  $2890\text{ cm}^{-1}$  attributable to the C–H stretching vibrations of methyl and methylene groups of POSS terminations. The vibrations typical of methacryloxy groups ( $\nu\text{ C=O}$ ,  $\nu\text{ C=C}$ ,  $\nu\text{ -C-CO-O-}$ ) and the Si–O–C stretching increase in intensity if compared to those observed in ZnO-TMMS (see inset Fig. S1b).

(i) C. G. Allen, D. J. Baker, J. M. Albin, H. E. Oertli, D. T. Gillaspie, D. C. Olson, T. E. Furtak, R. T. Collins *Langmuir* **2008**, *24*, 13393–13398

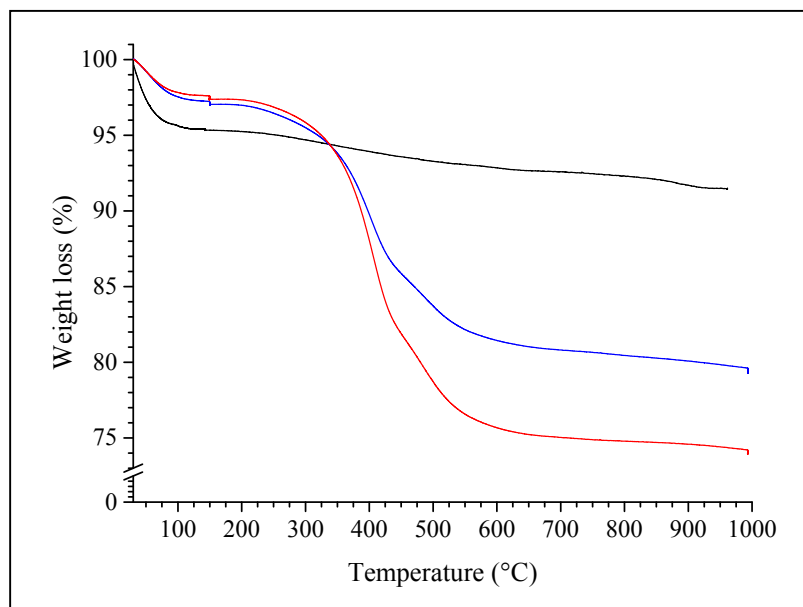

**Figure S2.** TGA curves of pristine SiO<sub>2</sub> Rhodia (black line), SiO<sub>2</sub>-TMMS (blue line) and SiO<sub>2</sub>@POSS-10 (red line) nanoparticles.

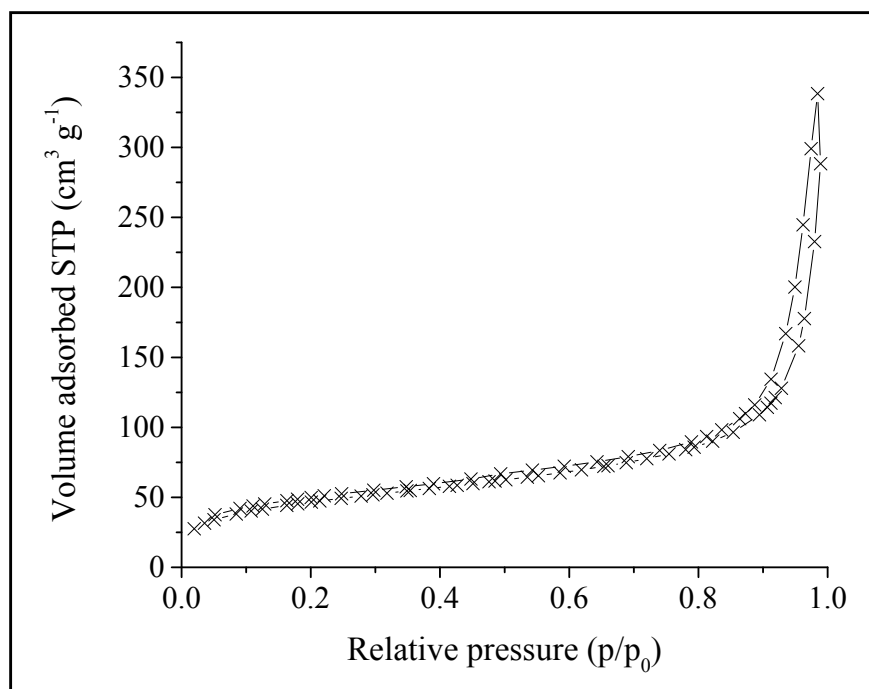

**Figure S3.** Adsorption/desorption isotherms at liquid nitrogen temperature for pristine SiO<sub>2</sub> Rhodia NPs. The curve corresponds to a type IV isotherm with capillary condensation in the mesopores.

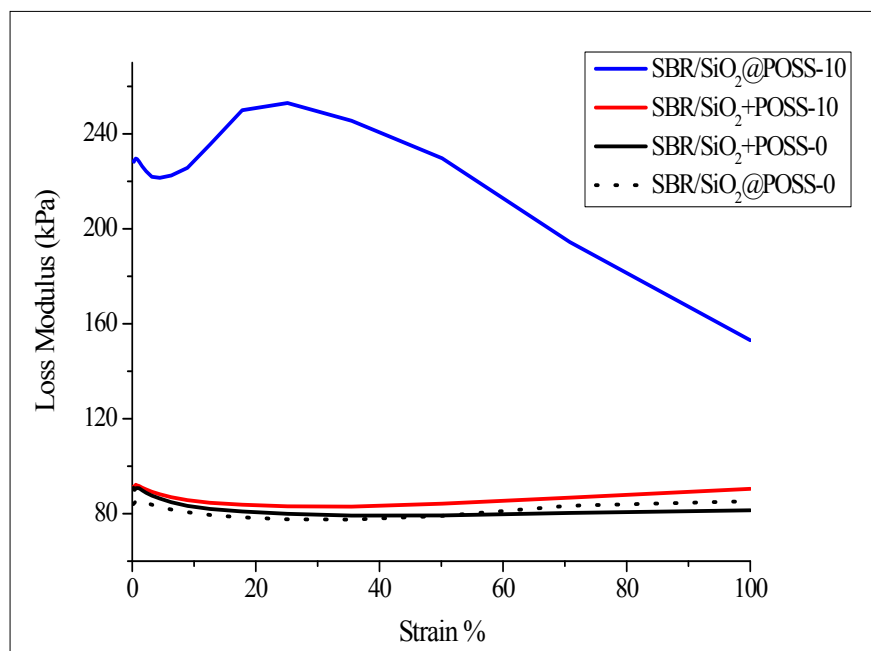

**Figure S4.** Loss modulus ( $G''$ ) vs. strain for the uncured composites.
